# Supplementary material for: Novel aminothiazole-supported chlorocellulose composite for the efficient removal of cationic dyes from wastewater
Source: Royal Society of Chemistry journal article supplement (doi:10.1039/d5ra03131a), 2025-01-01
Supplement: d5ra03131a1.pdf [file d5ra03131a1.pdf]

### Contents of supplementary data

**Fig. 1S:** (a,b) Nitrogen adsorption- desorption isotherms, (c,d) average pore diameter  
Note:(a,c for cellulose ) &(b,d for MC)

**Fig. 2S:** Effect of adsorbent dosage on of the dyes adsorption on MC studied dyes (100 mg L<sup>-1</sup>), sorbent (1g/L), pH =6 for BG, MG and pH= 10 for CV, MB, at 308 K

**Fig. 3S:** Adsorption isotherms at different MC dosages ( (25-600) mg/L) initial concentrations, studied dyes (100 mg L<sup>-1</sup>), sorbent (1g/L), pH =6 for BG, MG and pH= 10 for CV, MB, at 308 K

Fig.4S: adsorption isotherms models by MC the nonlinear curve fittings a) MC-MB  
b)MC-CV c) MC-BG d) MC-MG

**Fig. 5S:** Effect of contact time on the removal efficiency of the studied dyes by MC: studied dyes (100 mg L<sup>-1</sup>), sorbent (1g/L), pH =6 for BG, MG and pH= 10 for CV, MB, at 308 K.

Fig. 6S: Kinetic models fittings for the studied dyes adsorption on MC.

**Fig. 7S:** Plot of  $\ln K_C$  vs  $1/T$  absolute temperature.

**Fig 8S:** A) Various eluents were used to desorb CV, MB, BG, and MG from the MC adsorbent. B) Ethanol and HCl in a 1:1 ratio served as an eluent for five cycles of adsorption and desorption of CV, MB, BG, and MG..

Table 1S: Elemental analysis of the prepared materials.

**Table 2 S:** Adsorption kinetics and isotherms nonlinear models

**Table 3S:** Thermodynamic parameters of the studied adsorption processes.

**Table 4S:** Effect ionic strength on the removal percentages of the studied dyes .
