# Supplementary material for: Novel aminothiazole-supported chlorocellulose composite for the efficient removal of cationic dyes from wastewater
Source: Royal Society of Chemistry journal article supplement (doi:10.1039/d5ra03131a), 2025-01-01
Supplement: d5ra03131a2.pdf [file d5ra03131a2.pdf]

## Novel Aminothiazole- supported chlorocellulose for efficient removal of cationic dyes from wastewater

Abdelrahman S El-Zeny<sup>1</sup>, El-Sayed RH El-Gharkawy<sup>1</sup>, Tarek A. Gad-Allah<sup>2</sup> and Magda A Akl<sup>1\*</sup>

<sup>1</sup>Department of Chemistry, Faculty of Science, Mansoura University, Mansoura 35516, Egypt

<sup>2</sup>Water Pollution Research Department, National Research Centre, 33 El Buhouth St., Dokki, 12622 Giza, Egypt

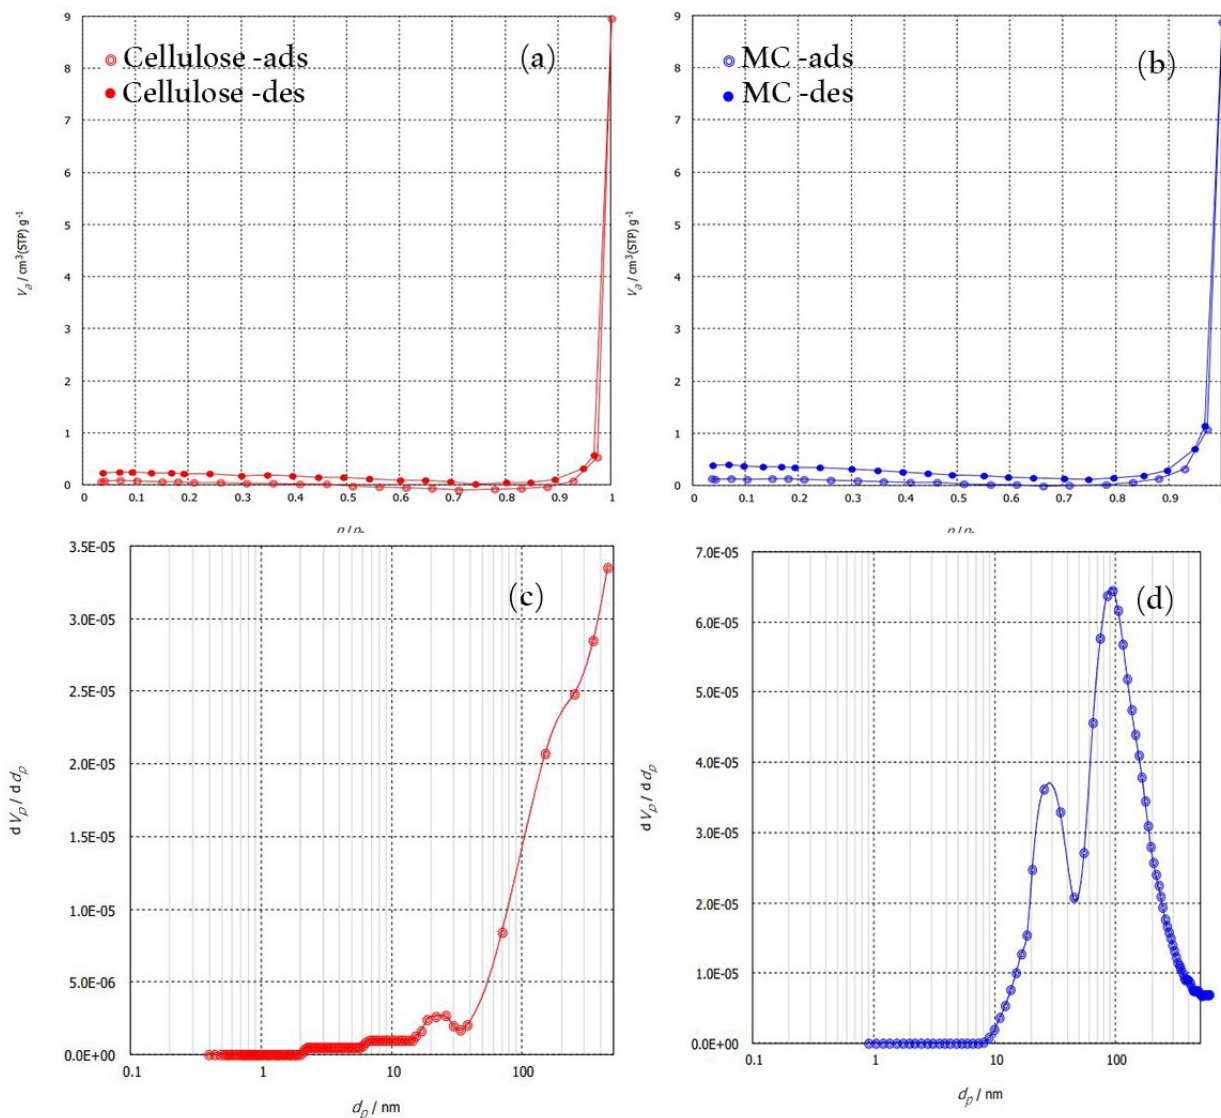

Fig. 1S: (a,b) Nitrogen adsorption- desorption isotherms, (c,d) average pore diameter  
Note:(a,c for cellulose ) &(b,d for MC)

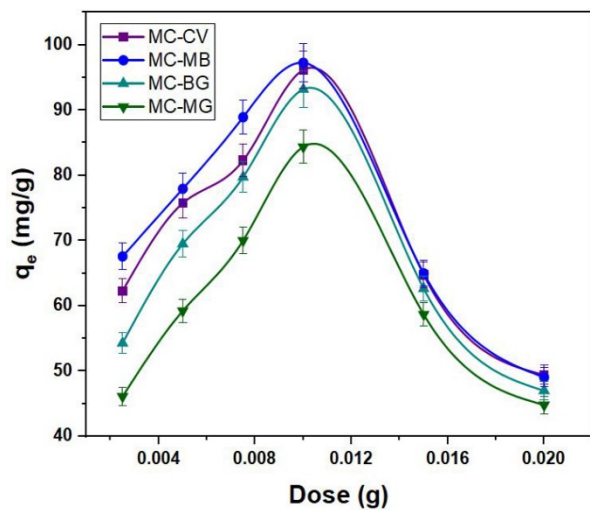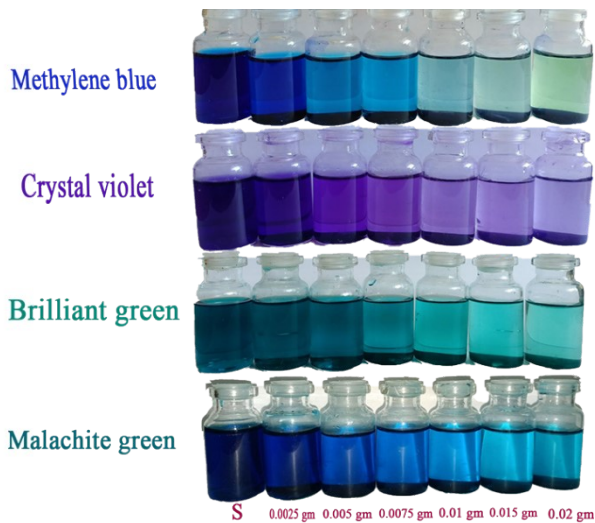

Fig. 2S: Effect of adsorbent dosage on of the dyes adsorption on MC studied dyes ( $100 \text{ mg L}^{-1}$ ), sorbent ( $1\text{g/L}$ ),  $\text{pH}=6$  for BG, MG and  $\text{pH}=10$  for CV, MB, at  $308 \text{ K}$

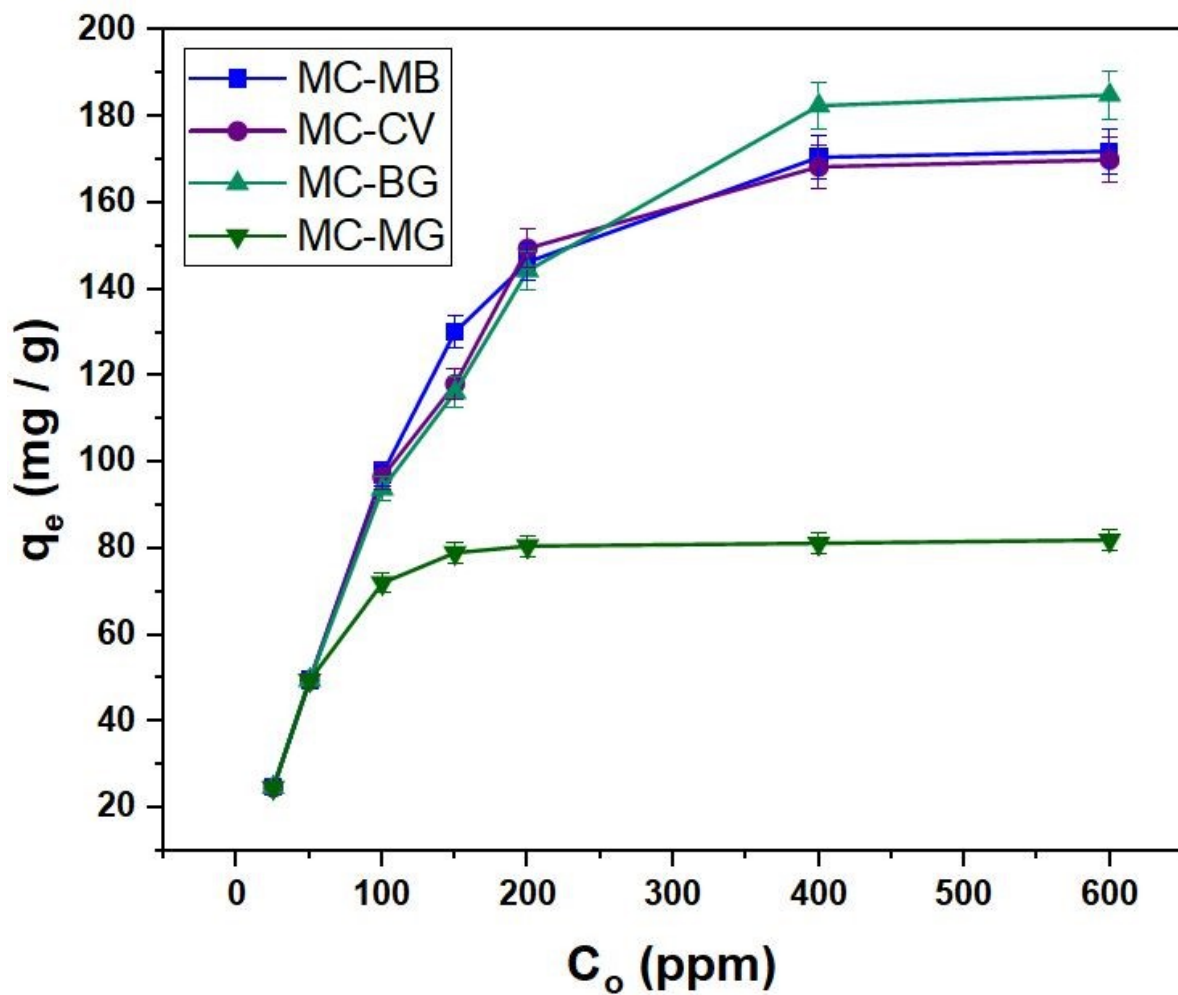

Fig. 3S: Adsorption isotherms at different MC dosages ( (25-600) mg/L) initial concentrations, studied dyes ( $100 \text{ mg L}^{-1}$ ), sorbent ( $1 \text{ g/L}$ ), pH =6 for BG, MG and pH= 10 for CV, MB, at 308 K

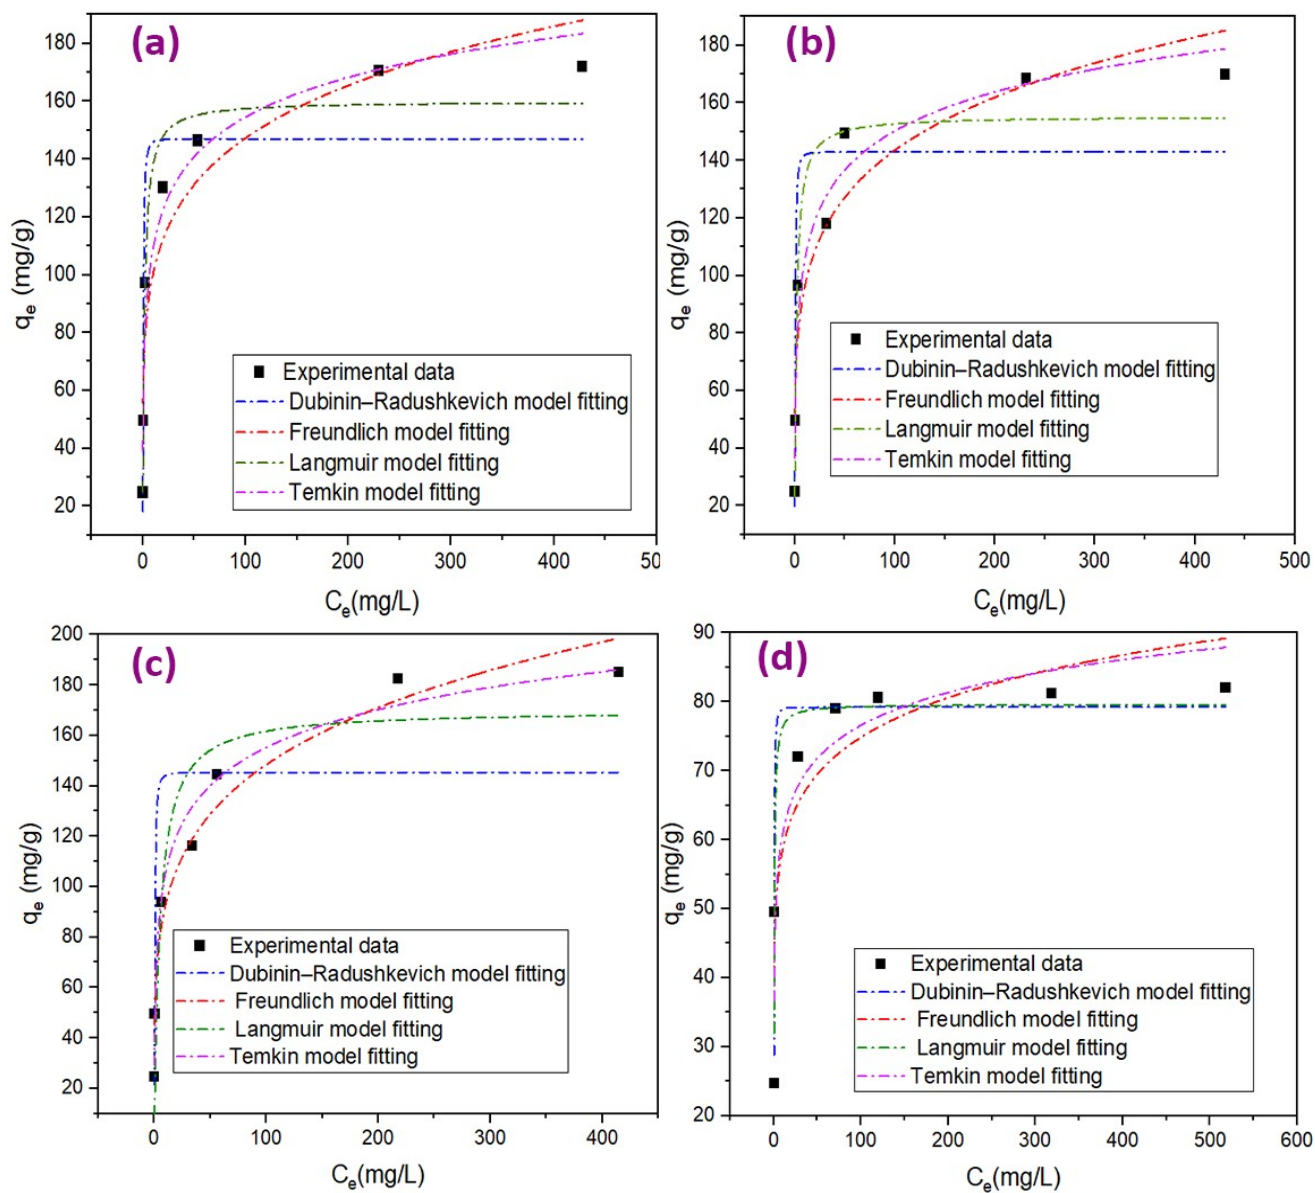

Fig.4S: adsorption isotherms models by MC the nonlinear curve fittings

a) MC-MB   b) MC-CV   c) MC-BG   d) MC-MG

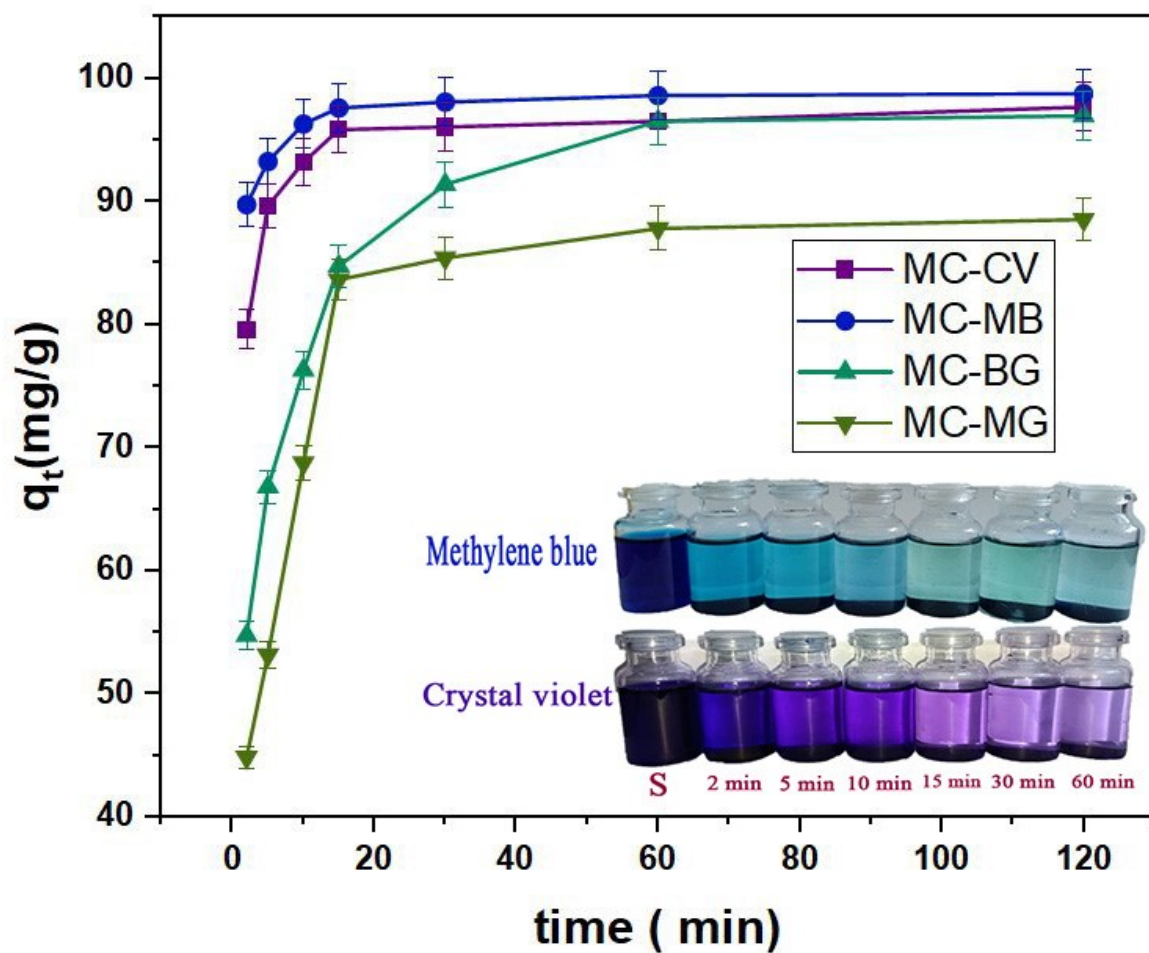

**Fig. 5S:** Effect of contact time on the removal efficiency of the studied dyes by MC: studied dyes ( $100 \text{ mg L}^{-1}$ ), sorbent ( $1 \text{ g/L}$ ), pH =6 for BG, MG and pH= 10 for CV, MB, at 308 K.

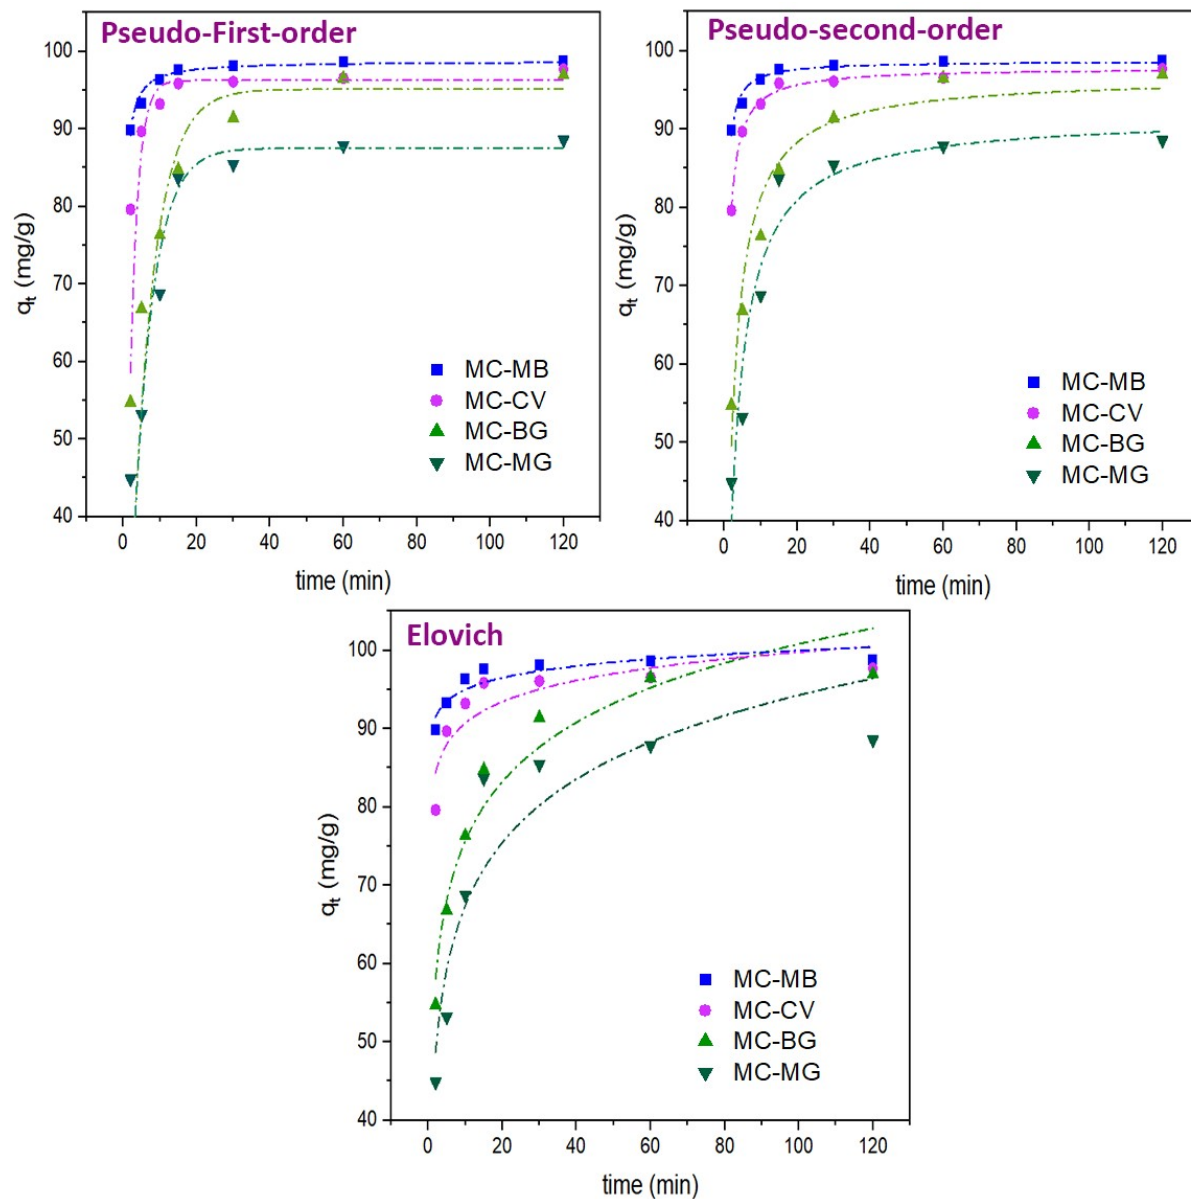

Fig. 6S: Kinetic models fittings for the studied dyes adsorption on MC.



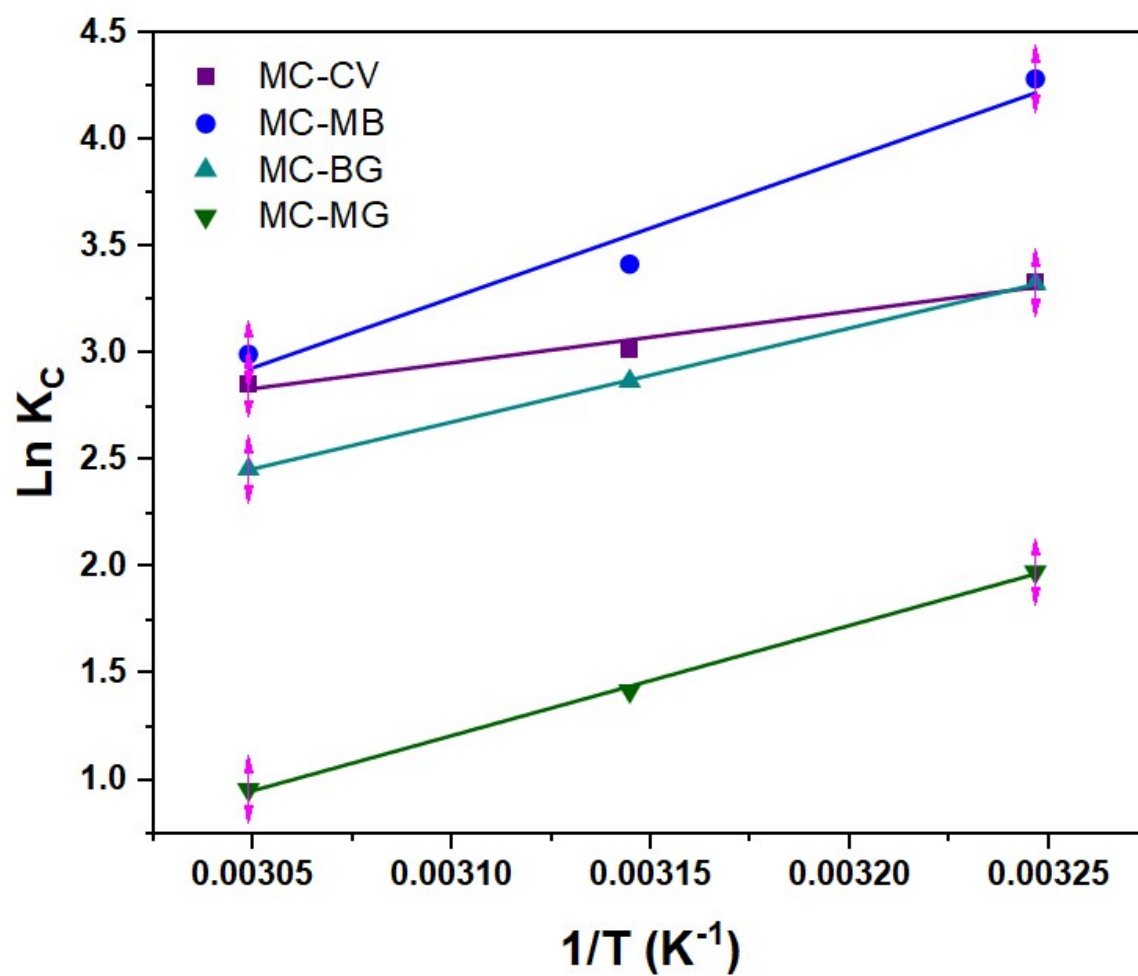

**Fig. 7S:** Plot of  $\ln K_C$  vs  $1/T$  absolute temperature.

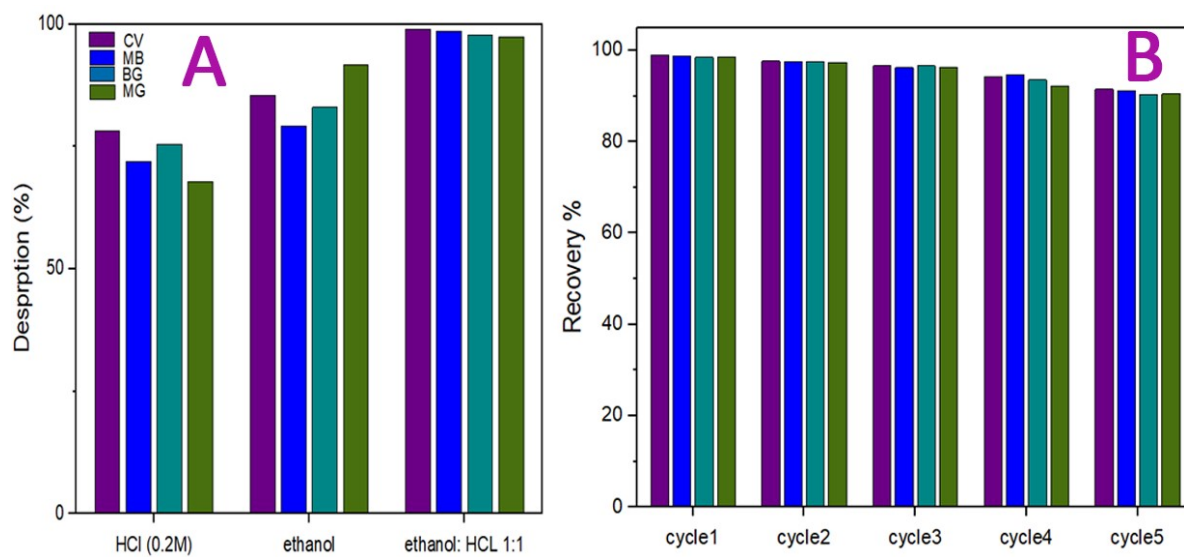

**Fig 8S:** A) Various eluents were used to desorb CV, MB, BG, and MG from the MC adsorbent. B) Ethanol and HCl in a 1:1 ratio served as an eluent for five cycles of adsorption and desorption of CV, MB, BG, and MG..



Table 1S: Elemental analysis of the prepared materials.

| Material     | C (%)            | H (%)           | N (%)            | S (%)            |
|--------------|------------------|-----------------|------------------|------------------|
| Ligand       | 35.1<br>(34.87)* | 4.52<br>(4.68)* | 32.1<br>(32.54)* | 18.4<br>(18.62)* |
| Cellulose    | 41.55            | 6.05            | -----            | -----            |
| Cellulose-Cl | 39.92            | 5.72            | -----            | -----            |
| MC           | 41.8             | 5.94            | 10.4             | 5.98             |

---

\*Calculated values.

**Table 2 S:** Adsorption kinetics and isotherms nonlinear models

| Models                    | Formula                                                                                                  | Descriptions                                                                                                                                                                                                                                                                                                                                                                                                                                                           |
|---------------------------|----------------------------------------------------------------------------------------------------------|------------------------------------------------------------------------------------------------------------------------------------------------------------------------------------------------------------------------------------------------------------------------------------------------------------------------------------------------------------------------------------------------------------------------------------------------------------------------|
| Pseudo-first order (PFO)  | $q_t = q_e(1 - e^{-K_1 t})$ ,                                                                            | $q_e$ (mg/g) represents the quantity that has been adsorbed when equilibrium is reached,<br>$q_t$ (mg/g) indicates the quantity adsorbed at a given time (min),<br>$K_1$ ( $\text{min}^{-1}$ ) is the constant for the pseudo-first-order reaction                                                                                                                                                                                                                     |
| Pseudo-second order (PSO) | $q_t = \frac{k_2 q_e^2 t}{1 + (k_2 q_e t)}$                                                              | $K_2$ (g/mg/min) Pseudo- second -order constant.                                                                                                                                                                                                                                                                                                                                                                                                                       |
| Elovich                   | $q_t = \left(\frac{1}{q_e}\right) \ln(1 + a_e q_e t)$ ,                                                  | $a_e$ (mg/(g.min)) rate constant of adsorption                                                                                                                                                                                                                                                                                                                                                                                                                         |
| Langmuir                  | $q_e = q_m K_L \left( \frac{C_e}{1 + K_L C_e} \right)$ ,<br>$R_L = \left( \frac{1}{1 + K_L C_0} \right)$ | $q_e$ (mg/g) represents the quantity that has been adsorbed when equilibrium is reached,<br>$q_m$ (mg/g) indicates the highest capacity for monolayer adsorption,<br>$K_L$ (L/mg) is the equilibrium constant of Langmuir,<br>$R_L$ (–) is the separation factor of Langmuir: $R_L = 0$ means reversible, $0 < R_L < 1$ indicates favorable conditions, $R_L = 1$ signifies a linear relationship, and $R_L > 1$ shows unfavorable conditions.                         |
| Freundlich                | $q_e = K_F \left( C_e^n \right)^{\frac{1}{n}}$                                                           | $K_F$ (L/g) constant for Freundlich, $n$ exponent for Freundlich related to the affinity of adsorption.                                                                                                                                                                                                                                                                                                                                                                |
| Dubinin–Radushkevich      | $q_e = q_m \exp\left[-K_{DR} [RT \ln(1 + C_e)]^2\right]$                                                 | $q_e$ (mg/g) refers to the quantity of adsorption that occurs when equilibrium is reached,<br>$C_e$ (mg/L) indicates the concentration of the adsorbate at this equilibrium point,<br>$q_m$ represents the capacity for monolayer adsorption,<br>and $K_{DR}$ denotes the D-R constant that provides the energy of adsorption (E),<br>$E = \frac{1}{\sqrt{2K_{DR}}} \text{ KJ/mol}$<br>$T$ (K) represents the temperature, and $R$ denotes the universal gas constant. |

|        |                                    |                                                                                                                                                                                                                                                                                                       |
|--------|------------------------------------|-------------------------------------------------------------------------------------------------------------------------------------------------------------------------------------------------------------------------------------------------------------------------------------------------------|
| Temkin | $q_e = \frac{RT}{b} \ln(K_T C_e),$ | <p><math>q_e</math> (mg/g) refers to the quantity of adsorbate that gets adsorbed when equilibrium is reached.</p> <p><math>C_e</math> (mg/L) indicates the concentration of the adsorbate at equilibrium.</p> <p><math>T</math> (K) denotes the temperature, while <math>R</math> represents the</p> |
|--------|------------------------------------|-------------------------------------------------------------------------------------------------------------------------------------------------------------------------------------------------------------------------------------------------------------------------------------------------------|

**Table 3S:** Thermodynamic parameters of the studied adsorption processes.

| System | $K_c$    |          |         | $\Delta G^{\circ}_{ads}$ (KJ/mol) |         |          | $\Delta H^{\circ}_{ads}$ | $\Delta S^{\circ}_{ads}$ |
|--------|----------|----------|---------|-----------------------------------|---------|----------|--------------------------|--------------------------|
|        | 308 K    | 318 K    | 328 K   | 308 K                             | 318 K   | 328 K    | (KJ/mol)                 | (J/mol K)                |
| MC-CV  | 27.96667 | 20.4333  | 17.3714 | -8529.77                          | -7976.9 | -7785.09 | -20057.9                 | -37.612                  |
| MC-MB  | 72.65    | 30.475   | 19.9833 | -10974.3                          | -9033.8 | -8167.06 | -54384.7                 | -141.488                 |
| MC-BG  | 27.82609 | 17.6176  | 11.66   | -8516.86                          | -7584.9 | -6697.94 | -36535.7                 | -90.993                  |
| MC-MG  | 7.213675 | 4.128492 | 2.6     | -5059.91                          | -3748.7 | -2605.67 | -42883.1                 | -122.888                 |

**Table 4S:** Effect ionic strength on the removal percentages of the studied dyes .

| Salts                        | Removal (%) |      |      |      |  |
|------------------------------|-------------|------|------|------|--|
|                              | CV          | MB   | BG   | MG   |  |
| NaCl (0.1M)                  | 99.0        | 99.3 | 98.3 | 98.4 |  |
| KCl (0.1M)                   | 98.1        | 98.7 | 98.2 | 98.1 |  |
| MgCl <sub>2</sub> (0.1M)     | 97.8        | 98.4 | 98.2 | 97.8 |  |
| AlCl <sub>3</sub> (0.1M)     | 97.5        | 96.4 | 95.7 | 96.1 |  |
| CH <sub>3</sub> COONa (0.1M) | 97.8        | 97.4 | 97.2 | 97.1 |  |
